# Supplementary material
Source: publisher site journal article supplement (https://www.spandidos-publications.com/160/downloadSupplementary)

Figure S1. Effect of Sr on osteogenic differentiation of MC3T3E1 cells. The MC3T3E1 cells were treated with various concentrations of Sr (0, 1, or 3 mM). (A and B) Gene expression of OCN and RUNX2 following 3 days of incubation as detected by RTqPCR, normalized against GAPDH. The results are expressed as the means  $\pm$  SD (n=3 for each group). \*P<0.05; \*\*P<0.01 compared with the control group. Sr, strontium chloride; OCN, osteocalcin; RUNX2, Runt related transcription factor 2.

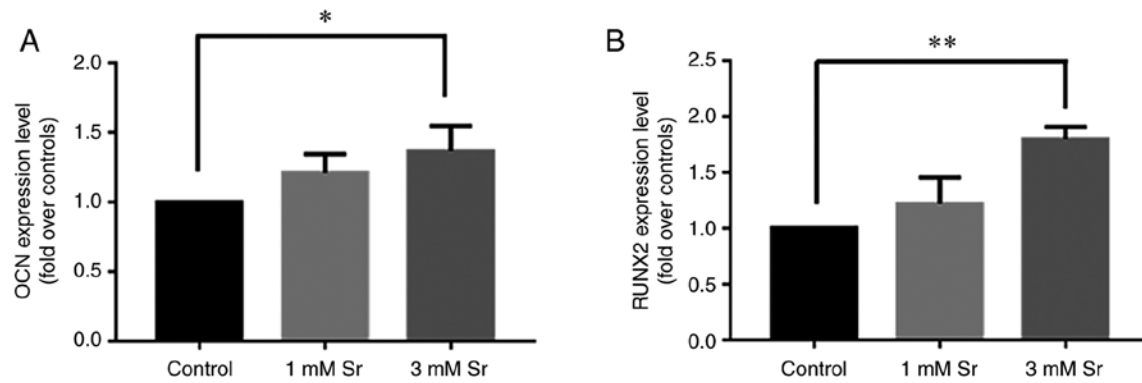

Figure S2. Effects of 6 and 12 mM Sr on autophagy associated protein, as detected by western blot analysis. (A and B) The expression level of LC3II was decreased in both of the Sr treatment groups. The results are expressed as the means  $\pm$  SD (n=3 for each group). \*\*P<0.01 compared with the control group. Sr, strontium chloride; LC, microtubule associated protein 1 light chain 3.

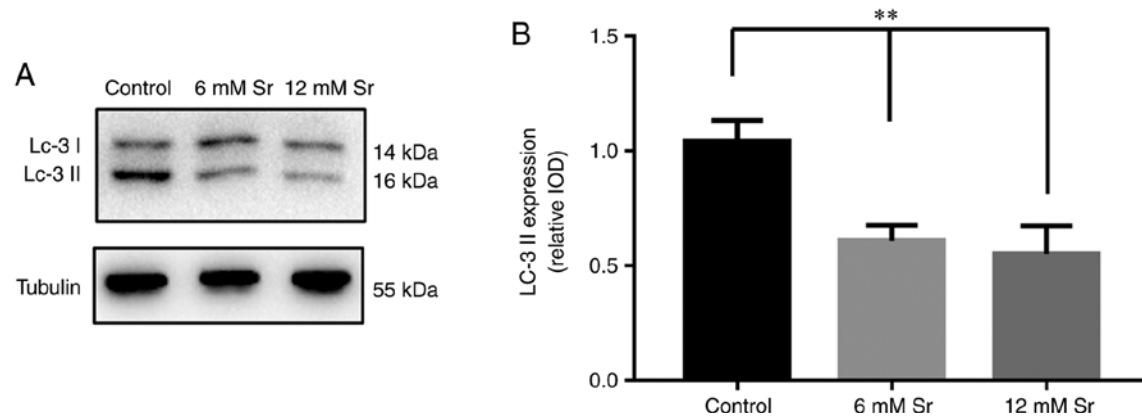

Supplement: Supplementary file 1 [file downloadSupplementary]
